# Supplementary material for: Compact large area and high-quality Au film with a hierarchical structure and its application in SERS
Source: Royal Society of Chemistry journal article supplement (doi:10.1039/c3cp51080h), 2013-01-01
Supplement: c3cp51080h_2.pdf [file c3cp51080h_2.pdf]

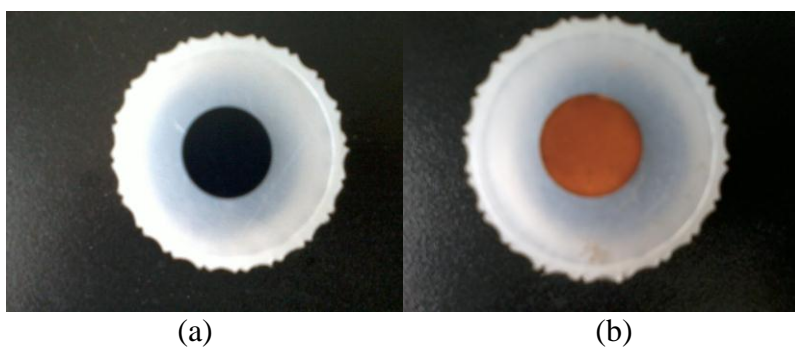

Fig.S1 The optical images of TSA- doped PANI silice before (a) and after (b) being immersed in 2 wt.%  $\text{HAuCl}_4$  aqueous solution for 12 h without stirring, respectively.
