# Supplementary material for: Compact large area and high-quality Au film with a hierarchical structure and its application in SERS
Source: Royal Society of Chemistry journal article supplement (doi:10.1039/c3cp51080h), 2013-01-01
Supplement: c3cp51080h_6.pdf [file c3cp51080h_6.pdf]

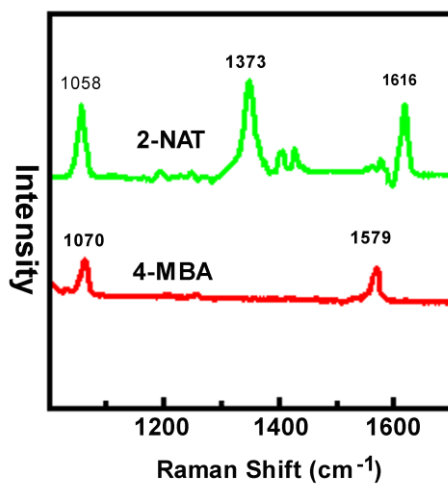

Fig.S5 SERS spectra of 2-NAT and 4-MBA at  $10^{-10}$  M by using Au HS film as a substrate which prepared at 2 wt% of H<sub>2</sub>AuCl<sub>4</sub> on the TSA-doped PANI slice.
